# Supplementary material for: Vibrational spectroscopic study of three Mg–Ni mineral series in white and greenish clay infillings of the New Caledonian Ni-silicate ores
Source: Copernicus journal article supplement (doi:10.5194/ejm-33-743-2021), 2021-12-17
Supplement: Supplementary file 1 [file ejm-33-743-2021-supplement.zip]

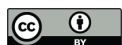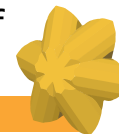

## *Supplement of*

# **Vibrational spectroscopic study of three Mg–Ni mineral series in white and greenish clay infillings of the New Caledonian Ni-silicate ores**

**Emmanuel Fritsch et al.**

*Correspondence to:* Emmanuel Fritsch ([ejc.fritsch@gmail.com](mailto:ejc.fritsch@gmail.com))

- [ejm-33-743-2021-supplement-title-page.pdf](#)
- [Fig4a XRD SL.qpc](#)
- [Fig4a XRD SL1 BON-C2-1c.txt](#)
- [Fig4a XRD SL10 STA17b\(34\).txt](#)
- [Fig4a XRD SL13 C2-Nep\(21\).txt](#)
- [Fig4a XRD SL8 STA17c\(35\).txt](#)
- [Fig4c NIR L13.txt](#)
- [Fig4c NIR SL.qpc](#)
- [Fig4c NIR SL1.txt](#)
- [Fig4c NIR SL10.txt](#)
- [Fig4c NIR SL8.txt](#)
- [Fig4d MIR SL.qpc](#)
- [Fig4d MIR SL1 BON-C2-1c.txt](#)
- [Fig4d MIR SL10 STA17b.txt](#)
- [Fig4d MIR SL13 C2-Nep.txt](#)
- [Fig4d MIR SL8 STA17c.txt](#)
- [Fig5a DRX SL12.txt](#)
- [Fig5a DRX STL.qpc](#)
- [Fig5a DRX STL11 BON-BR2c.txt](#)
- [Fig5a DRX STL19.txt](#)

- Fig5a DRX STL7 BON-BR2b.txt
- Fig5c NIR SL12.txt
- Fig5c NIR STL.qpc
- Fig5c NIR STL11.txt
- Fig5c NIR STL19.txt
- Fig5c NIR STL7.txt
- Fig5d MIR SL12 STA-G2.txt
- Fig5d MIR STL.qpc
- Fig5d MIR STL11 BON-BR2c.txt
- Fig5d MIR STL19 STA.txt
- Fig5d MIR STL7 BON-BR2b.txt
- Fig6a XRD STL14 Mg5a.txt
- Fig6a XRD STL3 BON-BR2.txt
- Fig6a XRD TL8 LF-STA5a2.txt
- Fig6a XRD TL9 FAT12-f4.txt
- Fig6a XRD.qpc
- Fig6c NIR STL14.txt
- Fig6c NIR STL3.txt
- Fig6c NIR TL8.txt
- Fig6c NIR TL9.txt
- Fig6c NIR.qpc
- Fig6d MIR STL14 LF-STA5g.txt
- Fig6d MIR STL3 BON-BR2.txt
- Fig6d MIR TL8 LF-STA5a2.txt
- Fig6d MIR TL9 BON-FAT12f4.txt
- Fig6d MIR.qpc
- Fig7a DRX TL.qpc
- Fig7a DRX TL10 FAT12-f3.txt
- Fig7a DRX TL4 MG3aWil(27).txt
- Fig7a DRX TL5.txt
- Fig7a DRX TL6.txt
- Fig7c NIR TL.qpc
- Fig7c NIR TL10.txt

- Fig7c NIR TL4.txt
- Fig7c NIR TL5.txt
- Fig7c NIR TL6.txt
- Fig7d MIR TL.qpc
- Fig7d MIR TL10 BON-FAT12f3.txt
- Fig7d MIR TL4 MG3aWil.txt
- Fig7d MIR TL5 GOR180-E3.txt
- Fig7d MIR TL6 NEP-LUP3.txt
- Fig8a XRD SF1 Thio-CS1a.txt
- Fig8a XRD SF4 MG4bWill(28).txt
- Fig8a XRD SF7 ThioGM-1d(24).txt
- Fig8a XRD Sep.qpc
- Fig8c NIR SF1.txt
- Fig8c NIR SF4.txt
- Fig8c NIR SF6.txt
- Fig8c NIR SF7.txt
- Fig8c NIR Sep.qpc
- Fig8d MIR SF1 THIO-CS1a.txt
- Fig8d MIR SF4-MG4bWil.txt
- Fig8d MIR SF6 NepKa2a.txt
- Fig8d MIR SF7 THIO-GM1d.txt
- Fig8d MIR Sep.qpc
- \_\_MACOSX
  - .\_Fig4a XRD SL.qpc
  - .\_Fig4a XRD SL1 BON-C2-1c.txt
  - .\_Fig4a XRD SL10 STA17b(34).txt
  - .\_Fig4a XRD SL13 C2-Nep(21).txt
  - .\_Fig4a XRD SL8 STA17c(35).txt
  - .\_Fig4c NIR L13.txt
  - .\_Fig4c NIR SL.qpc
  - .\_Fig4c NIR SL1.txt
  - .\_Fig4c NIR SL10.txt
  - .\_Fig4c NIR SL8.txt
  - .\_Fig4d MIR SL.qpc
  - .\_Fig4d MIR SL1 BON-C2-1c.txt
  - .\_Fig4d MIR SL10 STA17b.txt

- .\_Fig4d MIR SL13 C2-Nep.txt
- .\_Fig4d MIR SL8 STA17c.txt
- .\_Fig5a DRX SL12.txt
- .\_Fig5a DRX STL.qpc
- .\_Fig5a DRX STL11 BON-BR2c.txt
- .\_Fig5a DRX STL19.txt
- .\_Fig5a DRX STL7 BON-BR2b.txt
- .\_Fig5c NIR SL12.txt
- .\_Fig5c NIR STL.qpc
- .\_Fig5c NIR STL11.txt
- .\_Fig5c NIR STL19.txt
- .\_Fig5c NIR STL7.txt
- .\_Fig5d MIR SL12 STA-G2.txt
- .\_Fig5d MIR STL.qpc
- .\_Fig5d MIR STL11 BON-BR2c.txt
- .\_Fig5d MIR STL19 STA.txt
- .\_Fig5d MIR STL7 BON-BR2b.txt
- .\_Fig6a XRD STL14 Mg5a.txt
- .\_Fig6a XRD STL3 BON-BR2.txt
- .\_Fig6a XRD TL8 LF-STA5a2.txt
- .\_Fig6a XRD TL9 FAT12-f4.txt
- .\_Fig6a XRD.qpc
- .\_Fig6c NIR STL14.txt
- .\_Fig6c NIR STL3.txt
- .\_Fig6c NIR TL8.txt
- .\_Fig6c NIR TL9.txt
- .\_Fig6c NIR.qpc
- .\_Fig6d MIR STL14 LF-STA5g.txt
- .\_Fig6d MIR STL3 BON-BR2.txt
- .\_Fig6d MIR TL8 LF-STA5a2.txt
- .\_Fig6d MIR TL9 BON-FAT12f4.txt
- .\_Fig6d MIR.qpc
- .\_Fig7a DRX TL.qpc
- .\_Fig7a DRX TL10 FAT12-f3.txt
- .\_Fig7a DRX TL4 MG3aWil(27).txt
- .\_Fig7a DRX TL5.txt
- .\_Fig7a DRX TL6.txt
- .\_Fig7c NIR TL.qpc
- .\_Fig7c NIR TL10.txt
- .\_Fig7c NIR TL4.txt
- .\_Fig7c NIR TL5.txt
- .\_Fig7c NIR TL6.txt

- .\_Fig7d MIR TL.qpc
- .\_Fig7d MIR TL10 BON-FAT12f3.txt
- .\_Fig7d MIR TL4 MG3aWil.txt
- .\_Fig7d MIR TL5 GOR180-E3.txt
- .\_Fig7d MIR TL6 NEP-LUP3.txt
- .\_Fig8a XRD SF1 Thio-CS1a.txt
- .\_Fig8a XRD SF4 MG4bWill(28).txt
- .\_Fig8a XRD SF7 ThioGM-1d(24).txt
- .\_Fig8a XRD Sep.qpc
- .\_Fig8c NIR SF1.txt
- .\_Fig8c NIR SF4.txt
- .\_Fig8c NIR SF6.txt
- .\_Fig8c NIR SF7.txt
- .\_Fig8c NIR Sep.qpc
- .\_Fig8d MIR SF1 THIO-CS1a.txt
- .\_Fig8d MIR SF4-MG4bWil.txt
- .\_Fig8d MIR SF6 NepKa2a.txt
- .\_Fig8d MIR SF7 THIO-GM1d.txt
- .\_Fig8d MIR Sep.qpc

The copyright of individual parts of the supplement might differ from the article licence.
